# Supplementary material for: Targeting Periostin Expression Makes Pancreatic Cancer Spheroids More Vulnerable to Natural Killer Cells
Source: MDPI journal article supplement (doi:10.3390/biomedicines11020270), 2023-01-19
Supplement: s1 [file s1]

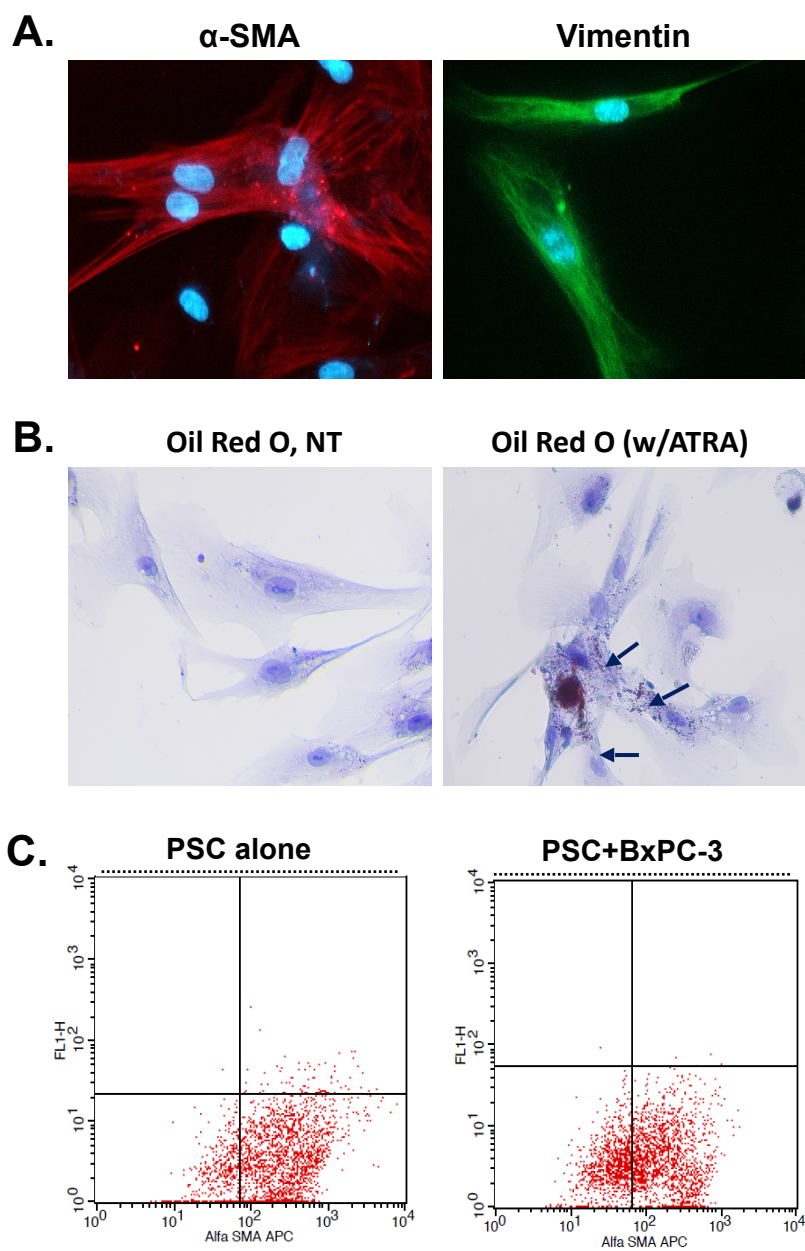

**Figure S1. (A, B)** The activation status of PSC cells was determined by  $\alpha$ -SMA **(A)** and Oil Red O **(B)** staining. **(C)**  $\alpha$ -SMA positivity was analyzed by flow cytometry in both PSC mono-culture and BxPC-3+PSC co-culture spheroids.

**A.**

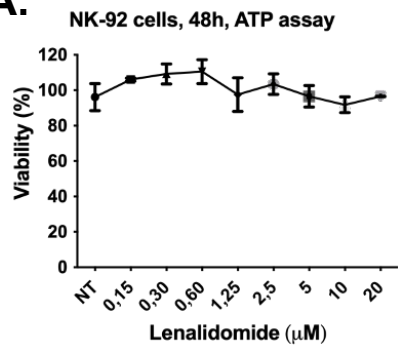

**B.**

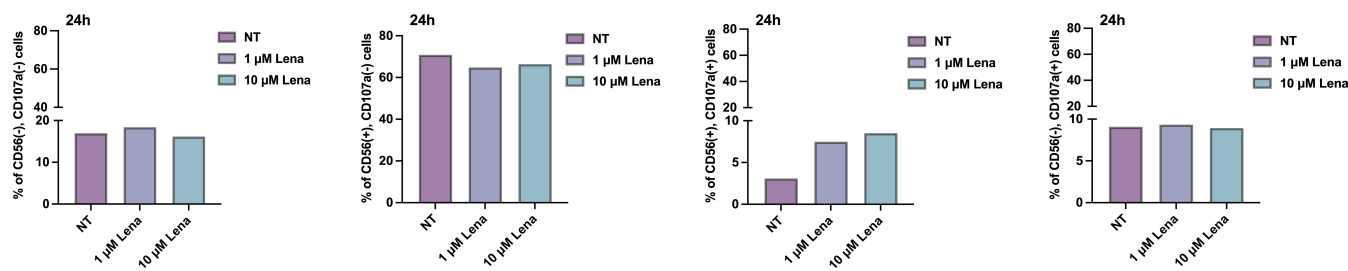

**C.**

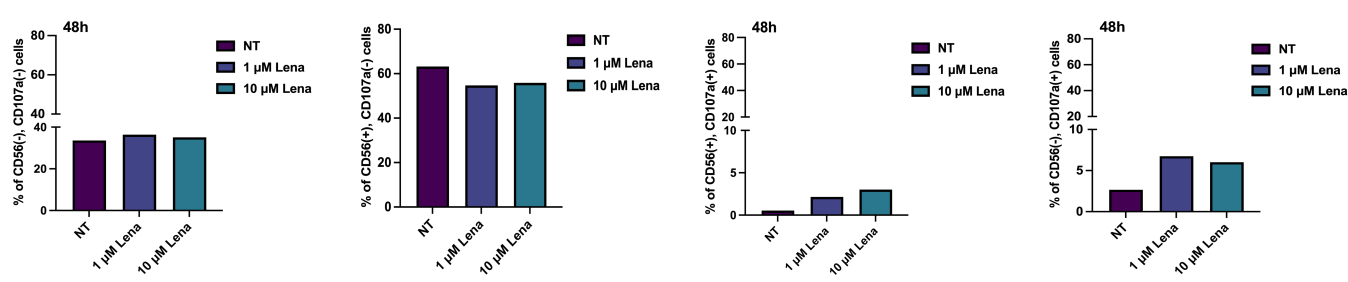

**Figure S2. (A)** NK-92 cells were treated with different concentrations (0.15-20 μM) of lenalidomide for 48h, and cell viability assessed by ATP assay. **(B,C)** The quantitative graphs for CD107a positivity in CD56 positive NK-92 cell population were evaluated after stimulation by either 1 or 10 μM lenalidomide. Graphs show CD107a status of the cells after **(B)** 24 h and **(C)** 48 h stimulation by lenalidomide.
